# Supplementary material for: The Pheno- and Genotypic Characterization of Porcine Escherichia coli Isolates
Source: MDPI journal article supplement (doi:10.3390/microorganisms9081676), 2021-08-06
Supplement: s1 [file s1]

**Table S1:** Results of the biocides susceptibility testing of *E. coli* isolated from pigs

| Minimal inhibitory concentration (MIC) |           |                             |          |           |          |         |        |        |        |        |        |
|----------------------------------------|-----------|-----------------------------|----------|-----------|----------|---------|--------|--------|--------|--------|--------|
| RSMB <sup>1</sup>                      |           | BENZALKONIUM CHLORIDE (BAC) |          |           |          |         |        |        |        |        |        |
| ≥0.004%                                | 0.000015% | 0.00003%                    | 0.00006% | 0.000125% | 0.00025% | 0.0005% | 0.001% | 0.002% | 0.004% | 0.008% | 0.016% |
| No of isolates                         |           |                             |          |           |          | 2       | 59     | 43     |        |        |        |
| RSMB                                   |           | CHLORHEXIDINE (CHX)         |          |           |          |         |        |        |        |        |        |
| ≥0.00025%                              | 0.000015% | 0.00003%                    | 0.00006% | 0.000125% | 0.00025% | 0.0005% | 0.001% | 0.002% |        |        |        |
| No of isolates                         |           | 12                          | 28       | 13        | 23       | 18      | 9      | 1      |        |        |        |
| RSMB                                   |           | GLUTARDIALDEHYDE (GLU)      |          |           |          |         |        |        |        |        |        |
| ≥0.5%                                  | 0.0075%   | 0.015%                      | 0.03%    | 0.06%     | 0.125%   | 0.25%   | 0.5%   | 1%     |        |        |        |
| No of isolates                         |           |                             | 4        | 49        | 28       | 21      | 2      |        |        |        |        |
| RSMB                                   |           | ISOPROPANOL (ISO)           |          |           |          |         |        |        |        |        |        |
| ≥10%                                   | <1%       | 1%                          | 2%       | 4%        | 6%       | 8%      | 10%    | 12%    | 14%    |        |        |
| No of isolates                         |           | 1                           | 6        | 26        | 54       | 16      | 1      |        |        |        |        |

Abbreviations: <sup>1</sup>Reduced susceptibility MIC breakpoint based on the established protocol of Schug et al. [21]

**Table S2:** Established MIC values of investigated biocides on reference strains

|                                                                | BAC <sup>5</sup> %                              |                 | CHX <sup>6</sup> (%)              |                 | ISO <sup>7</sup> (%)              |                 | GLU <sup>8</sup> (%)              |                 |
|----------------------------------------------------------------|-------------------------------------------------|-----------------|-----------------------------------|-----------------|-----------------------------------|-----------------|-----------------------------------|-----------------|
|                                                                | "Acceptable ranges – 24h" <sup>**</sup><br>[22] | Established MIC | "Acceptable ranges – 24h"<br>[22] | Established MIC | "Acceptable ranges – 24h"<br>[22] | Established MIC | "Acceptable ranges – 24h"<br>[22] | Established MIC |
| <i>S.</i> <sup>1</sup> <i>aureus</i><br>ATCC <sup>9</sup> 6538 | 0.00006-0.00025                                 | 0.0003          | 0.00003-0.000125                  | 0.00003         | 4-10                              | 8               | 0.03-0.25                         | 0.06            |
| <i>E.</i> <sup>2</sup> <i>hirae</i><br>ATCC 10541              | 0.000125-0.0005                                 | 0.0006          | 0.00003-0.00025                   | 0.00006         | 4-10                              | 8               | 0.06-0.25                         | 0.125           |
| <i>E.</i> <sup>3</sup> <i>coli</i><br>ATCC 10536               | 0.0005-0.002                                    | 0.0001          | 0.000016-0.000125                 | 0.00006         | 2-8                               | 4               | 0.03-0.25                         | 0.125           |
| <i>P.</i> <sup>4</sup> <i>aeruginosa</i><br>ATCC 15442         | 0.002-0.0016                                    | 0.004           | 0.001-0.004                       | 0.00025         | 1-6                               | 4               | 0.03-0.125                        | 0.125           |

Abbreviations: <sup>1</sup> *S.*, *Staphylococcus*, <sup>2</sup> *E.*, *Enterococcus*, <sup>3</sup> *E.*, *Escherichia*, <sup>4</sup> *P.*, *Pseudomonas*, <sup>5</sup> BAC, Benzalkonium Chloride, <sup>6</sup> CHX, Chlorhexidine, <sup>7</sup> ISO, Isopropanol, <sup>8</sup> GLU, Glutardialdehyde, <sup>9</sup> ATCC, American Type Culture Collection

<sup>\*</sup> based on the most common values +/- one dilution steps obtained for the different subgroups after incubation of 24 h.
