# Supplementary figures and images for: The Pheno- and Genotypic Characterization of Porcine Escherichia coli Isolates
Source: MDPI journal article supplement (doi:10.3390/microorganisms9081676), 2021-08-06

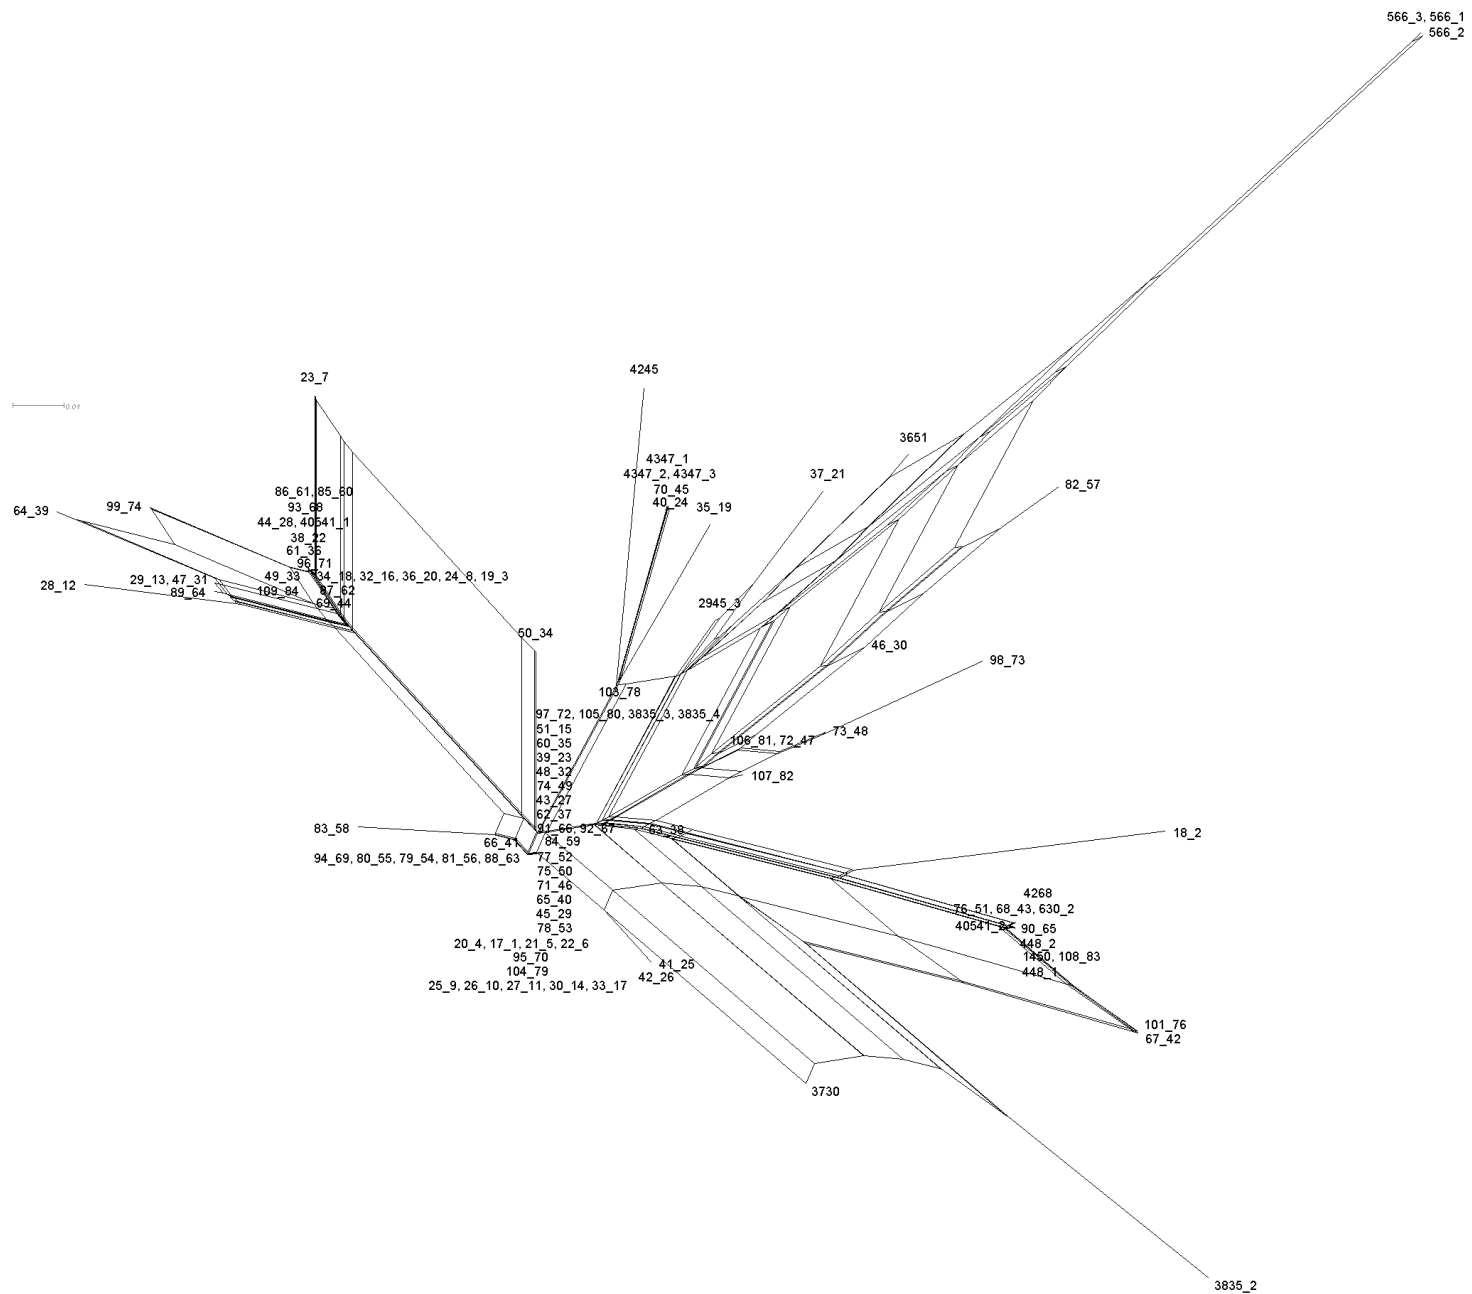

Supplement: s1 [file s1]

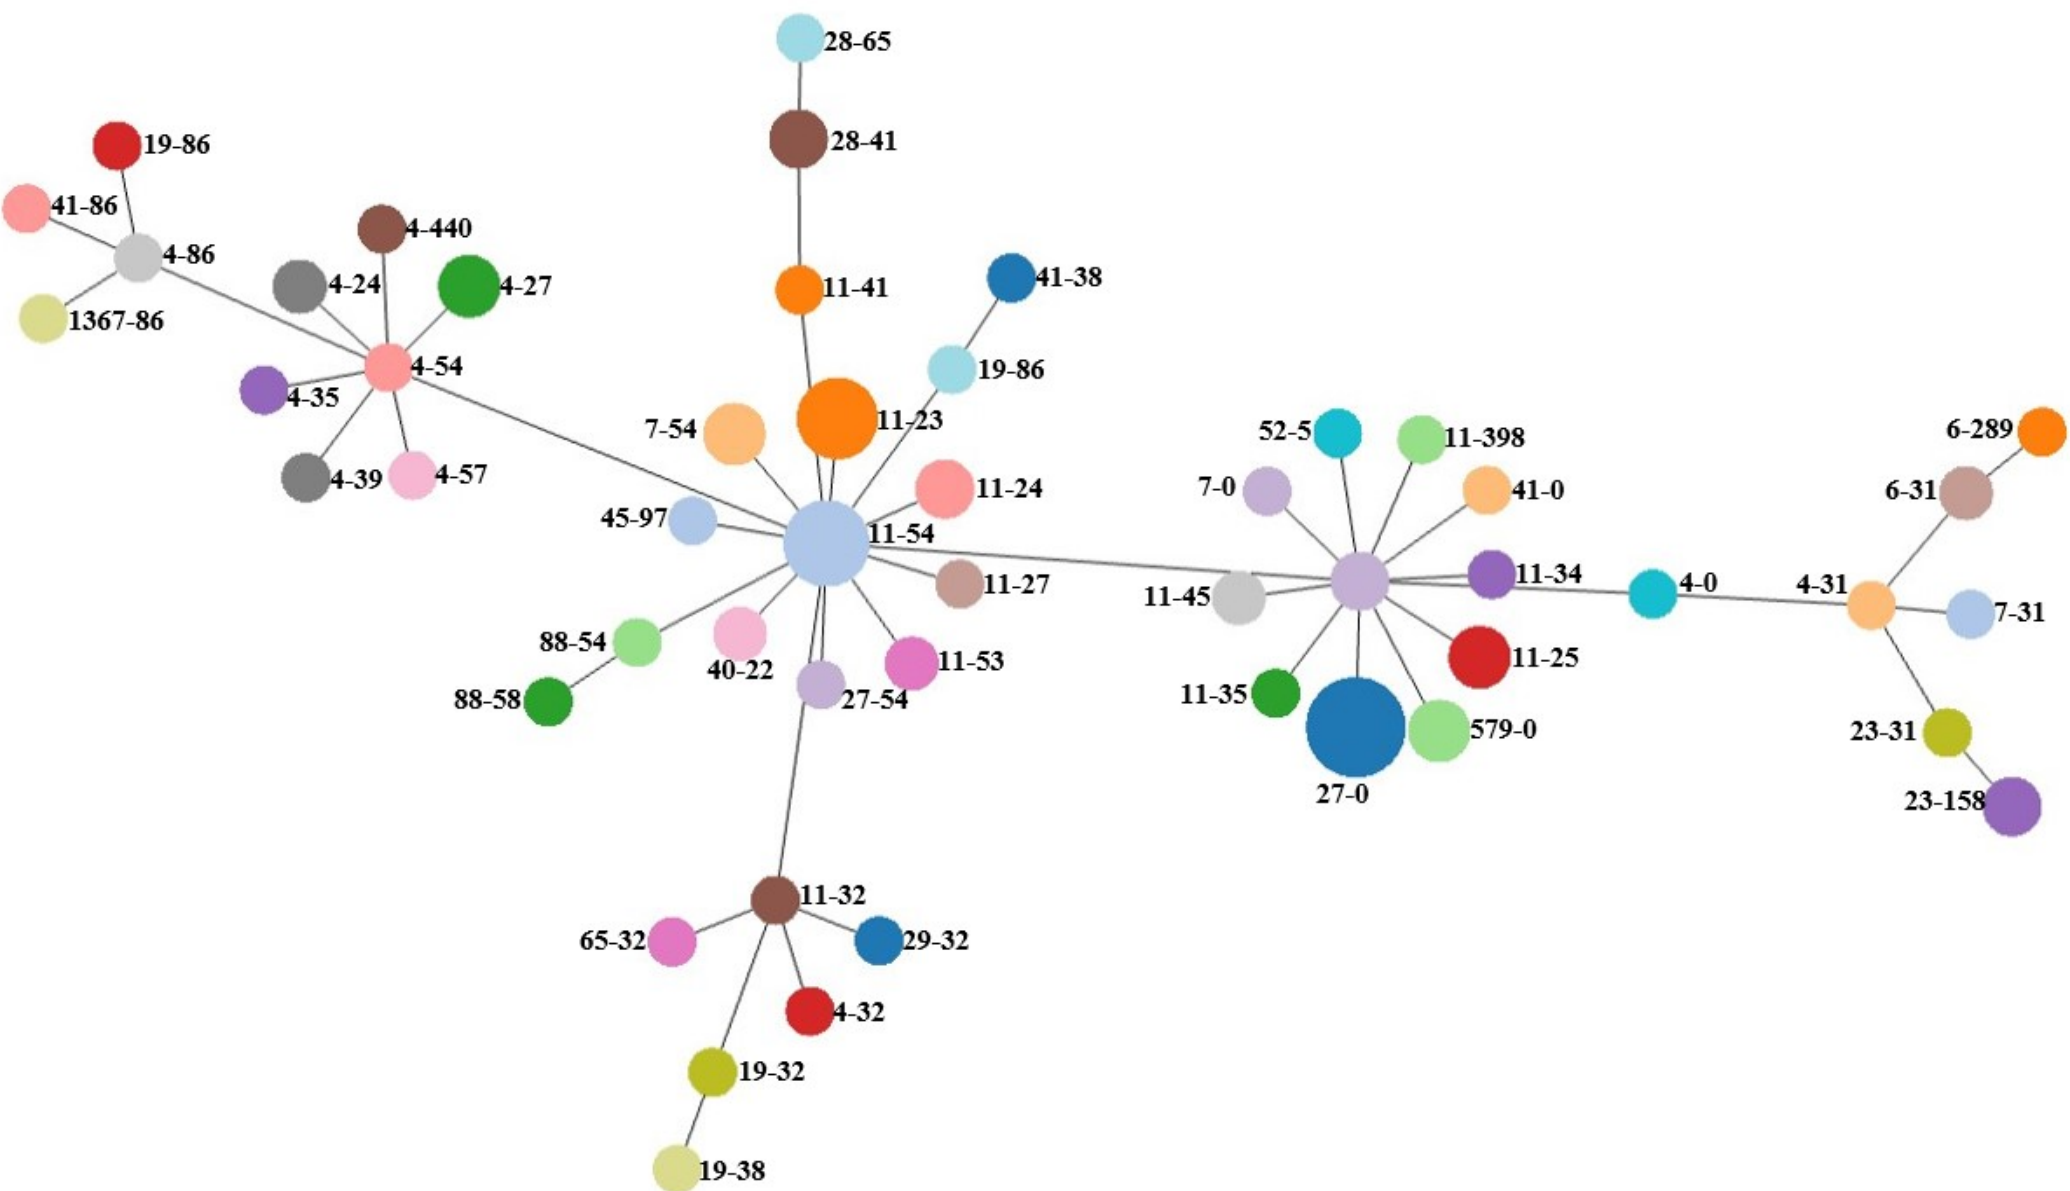

Supplement: s1 [file s1]
